# Supplementary material for: Enhanced Cytotoxic Effect of TAT–PLGA-Embedded DOXO Carried by Biomimetic Magnetic Nanoparticles upon Combination with Magnetic Hyperthermia and Photothermia
Source: MDPI journal article supplement (doi:10.3390/pharmaceutics13081168), 2021-07-28
Supplement: s1 [file s1]

# Supplementary Materials: Enhanced Cytotoxic Effect of TAT-PLGA-Embedded DOXO Carried by Biomimetic Magnetic Nanoparticles upon Combination with Magnetic Hyperthermia and Photothermia

Ylenia Jabalera, Alberto Sola-Leyva, Salvatore Calogero Gaglio, María P. Carrasco Jimenez, Guillermo R. Iglesias, Massimiliano Perduca and Concepción Jimenez-Lopez

**Table S1.** Summary of specific absorption rate (SAR) and intrinsic loss power (ILP) calculations concerning TAT-PLGA(DOXO-BMNPs) at different intensities and at fixed frequency of 120 kHz, after 30 seconds of exposure. Sample volume 0.2 ml; particles concentration of 10 mg/ml.

| Nanoformulation      | Field<br>[kA/m] | SAR<br>[W/g] | Slope dT/dt<br>[°C/s] | ILP<br>nH m <sup>2</sup> /kg |
|----------------------|-----------------|--------------|-----------------------|------------------------------|
| TAT-PLGA(DOXO-BMNPs) | 13.2 ± 0.2      | 7.4 ± 0.9    | 0.01                  | 0.36 ± 0.05                  |
|                      | 17.8 ± 0.2      | 17.0 ± 2.0   | 0.04                  | 0.48 ± 0.06                  |
|                      | 23.3 ± 0.2      | 24.0 ± 2.0   | 0.056                 | 0.37 ± 0.03                  |

**Table S2.** Summary of SAR and ILP calculations concerning PLGA(BMNPs) at different intensities and at fixed frequency of 120 kHz, after 30 seconds of exposure. Sample volume 0.2 ml; particles concentration of 10 mg/ml.

| Nanoformulation | Field<br>[kA/m] | SAR<br>[W/g] | Slope dT/dt<br>[°C/s] | ILP<br>nH m <sup>2</sup> /kg |
|-----------------|-----------------|--------------|-----------------------|------------------------------|
| PLGA(BMNPs)     | 13.4 ± 0.2      | 10 ± 1       | 0.02                  | 0.46 ± 0.05                  |
|                 | 17.7 ± 0.2      | 24 ± 2       | 0.06                  | 0.72 ± 0.04                  |
|                 | 23.2 ± 0.2      | 68 ± 5       | 0.16                  | 1.06 ± 0.80                  |

**Table S3.** Summary of SAR calculations concerning PLGA(BMNPs) and TAT-PLGA(DOXO-BMNPs) at different laser power densities (0.5, 1 and 2 W/cm<sup>2</sup>), after 120 seconds of exposure. Sample volume 0.2 ml; particles concentration of 19 mM.

| Nanoformulation      | Laser Power Density<br>[W/cm <sup>2</sup> ] | Slope dT/dt<br>[°C / s] |
|----------------------|---------------------------------------------|-------------------------|
| PLGA(BMNPs)          | 0.5 ± 0.1                                   | 0.024 ± 0.003           |
|                      | 1.0 ± 0.1                                   | 0.045 ± 0.002           |
|                      | 2.0 ± 0.1                                   | 0.120 ± 0.020           |
| TAT-PLGA(DOXO-BMNPs) | 0.5 ± 0.1                                   | 0.008 ± 0.001           |
|                      | 1.0 ± 0.1                                   | 0.029 ± 0.004           |
|                      | 2.0 ± 0.1                                   | 0.080 ± 0.010           |

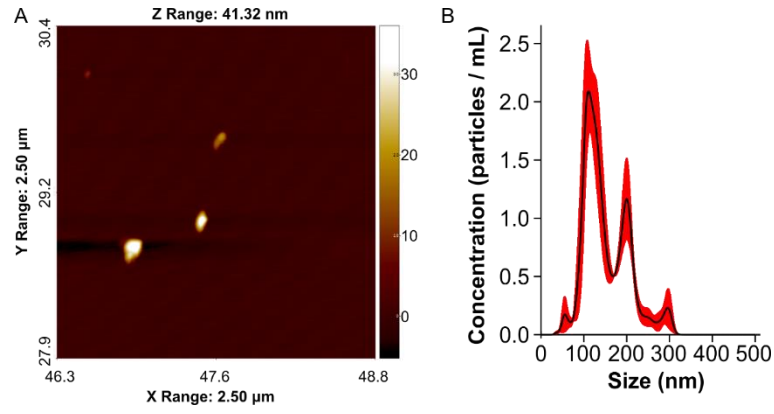

**Figure S1.** (A) AFM analysis and (B) NTA size diagram of the PLGA(BMNPs) nanoassembly.

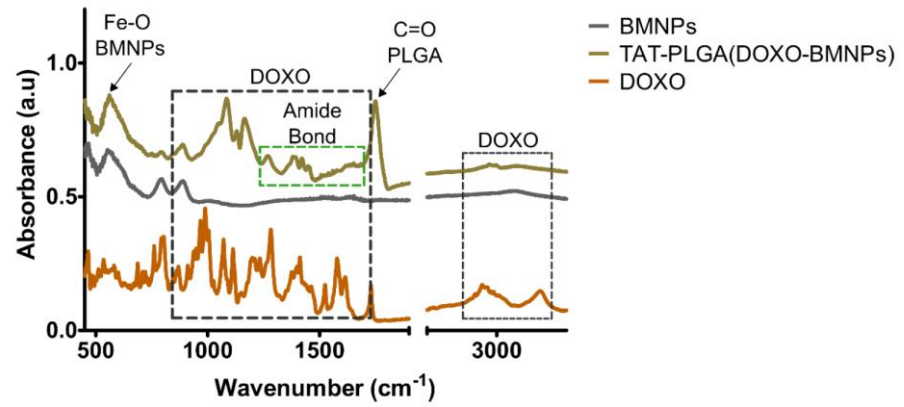

**Figure S2.** FT-IR analysis of BMNPs, TAT-PLGA(DOXO-BMNPs) and DOXO.

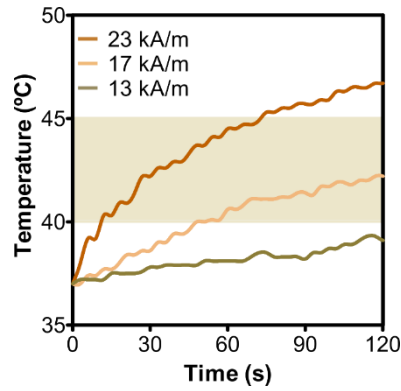

**Figure S3.** Time evolution of the temperature increase caused by PLGA(BMNPs) nanoassemblies following upon exposure to AMF of different magnetic field strengths at a fixed frequency of 120 kHz.

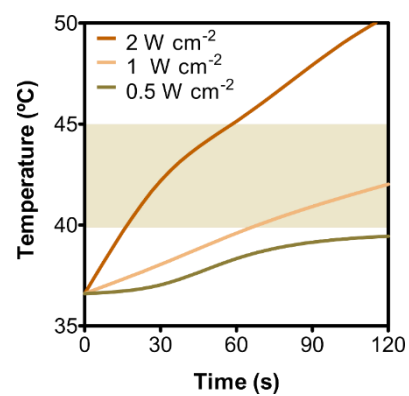

**Figure S4.** Time evolution of the temperature of PLGA(BMNPs) suspension at different laser power densities.
